# Supplementary material
Source: publisher figshare collection journal article supplement (https://rs.figshare.com/ndownloader/files/13587995)
Supplement: Supplementary file 1 [file 13587995]

## Sheet: Table S1.
Consequences of Sex Change for Effective Population Size. Robin S. Waples, Stefano Mariani, Chiara Benvenuto
Table S1. Age-specific vital rates for the 8 marine fish species. sx = annual survival, assumed the same for both sexes. Survival and age-specific female fecundity (bxf) were compiled by Benvenuto et al. (2017); male fecundity (bxm) was computed as described in the main text. SP = Semicossyphus pulcher (sheephead); SC = Spondyliosoma cantharus (black seabream); PE = Pagellus erythrinus (pandora);…
Age	SPsx	SPbxf	SPbxm	SCsx	SCbxf	SCbxm	PEsx	PEbxf	PEbxm	CPsx	CPbxf	CPbxm	LCsx	LCbxf	LCbxm	LMsx	LMbxf	LMbxm	DSsx	DSbxf	DSbxm	SAsx	SAbxf	SAbxm
1	0.378	0	0	0.297	0	0	0.368	0	0	0.297	0	0	0.37	0	0	0.296	0	0	0.316	0	0	0.33	0	0
2	0.628	0	0	0.547	38490	38490	0.618	0	0	0.547	0	0	0.62	0	0	0.546	0	0	0.566	0	0	0.58	0	0
3	0.711	0	0	0.63	106636	145126	0.701	138	138	0.63	48215	48215	0.703	0	0	0.63	103738	103738	0.649	73832	73832	0.663	519072	519072
4	0.753	1	1	0.671	216106	361232	0.743	323	299.5	0.67	64085	112300	0.745	5114750	5114750	0.671	194811	151561	0.69	162670	114147	0.705	937081	711274
5	0.778	2.1	3.1	0.693	362328	723560	0.768	619	609	0.692	79527	191827	0.77	7438790	6638780	0.695	304366	211717	0.715	291185	173113	0.729	1358587	914143
6	0.794	3.8	6.9	0.701	535780	1259340	0.785	1035	1126.5	0.701	94032	285859	0.787	9972434	8415089	0.708	421448	278685	0.73	453874	255078	0.745	1729911	1092801
7	0.806	6.1	13	0.69	725419	1984759	0.796	1567	1910	0.689	107312	393171	0.799	12613584	10368488	0.712	536935	341828	0.739	641669	360571	0.754	2030995	1219972
8	0.815	8.9	21.9	0.635	920946	2905705	0.805	2202	3011	0.635	119243	512414	0.807	15278144	12371296	0.697	644591	390355	0.739	844452	481894	0.754	2262526	1293280
9	0.822	12.2	34	0.469	1113951	4019655	0.812	2920	4471	0.469	129808	642223	0.814	17900525	14266698	0.641	740926	420389	0.722	1052773	601308	0.736	2434493	1329036
10	0.828	15.9	49.9	0	1298252	5317907	0.818	3699	6320.5	0	139060	781282	0.82	20432150	15913061	0.472	824563	435816	0.662	1258773	697834	0.675	2559296	1344749
11	0.832	19.8	69.8				0.822	4516	8578.5				0.825	22839068	17226785	0	895550	442800	0.487	1456509	760626	0.496	2648465	1351297
12	0.836	24	93.7				0.826	5349	11253				0.828	25099363	18197504				0	1641899	794160	0	2711503	1353961
13	0.839	28.2	121.9				0.829	6181	14343.5				0.831	27200664	18870536
14	0.842	32.4	154.3				0.831	6996	17841.5				0.834	29137938	19315103
15	0.844	36.5	190.8				0.832	7782	21732.5				0.836	30911620	19598848
16	0.846	40.5	231.3				0.831	8531	25998				0.838	32526073	19775825
17	0.848	44.2	275.5				0.823	9236	30616				0.838	33988358	19884583
18	0.85	47.8	323.3				0.798	9894	35563				0.837	35307277	19950798
19	0.851	51.2	374.5				0.728	10502	40814				0.828	36492637	19990880
20	0.852	54.3	428.7				0.533	11062	46345				0.803	37554704	20015059
21	0.853	57.1	485.9				0	11573	52131.5				0.732	38503797	20029613
22	0.854	59.7	545.6										0.536	39350012	20038362
23	0.854	62.1	607.7										0	40103019	20043618
24	0.851	64.3	672.1
25	0.842	66.3	738.3
26	0.816	68.1	806.4
27	0.743	69.7	876
28	0.543	71.1	947.1
29	0	72.4	1019.5
